# Supplementary material for: Bridging the gas and condensed phases for metal-atom encapsulating silicon- and germanium-cage superatoms: electrical properties of assembled superatoms
Source: Royal Society of Chemistry journal article supplement (doi:10.1039/d3cp00120b), 2023-01-01
Supplement: d3cp00120b1.pdf [file d3cp00120b1.pdf]

*Electronic Supplementary Information for*

**Bridging the Gas and Condensed Phases for Metal Atom  
Encapsulating Silicon- and Germanium-Cage Superatoms: Electrical  
Properties of Assembled Superatoms**

**Takaho Yokoyama<sup>a</sup> and Atsushi Nakajima<sup>\*,a</sup>**

*<sup>a</sup>Department of Chemistry, Faculty of Science and Technology, Keio University, 3-14-1 Hiyoshi,  
Kohoku-ku, Yokohama 223-8522, Japan*

\*Address correspondence to A. Nakajima

Tel: +81-45-566-1712, Fax: +81-45-566-1697, E-mail: nakajima@chem.keio.ac.jp

**Contents**

|                                                                                                                       |    |
|-----------------------------------------------------------------------------------------------------------------------|----|
| <b>Figure S1.</b> Mass spectra of M-Si NCs of M = Lu, Ti, Zr, Hf, V, Nb, and Ta.                                      | S2 |
| <b>Figure S2.</b> Plots of $\ln G$ versus $T^{-1/2}$ for Ti@Si <sub>16</sub> and Zr@Si <sub>16</sub> assembled films. | S2 |
| <b>Figure S3.</b> Plots of $\ln G$ versus $T^{-1/2}$ for Ta@Ge <sub>16</sub> assembled films.                         | S3 |

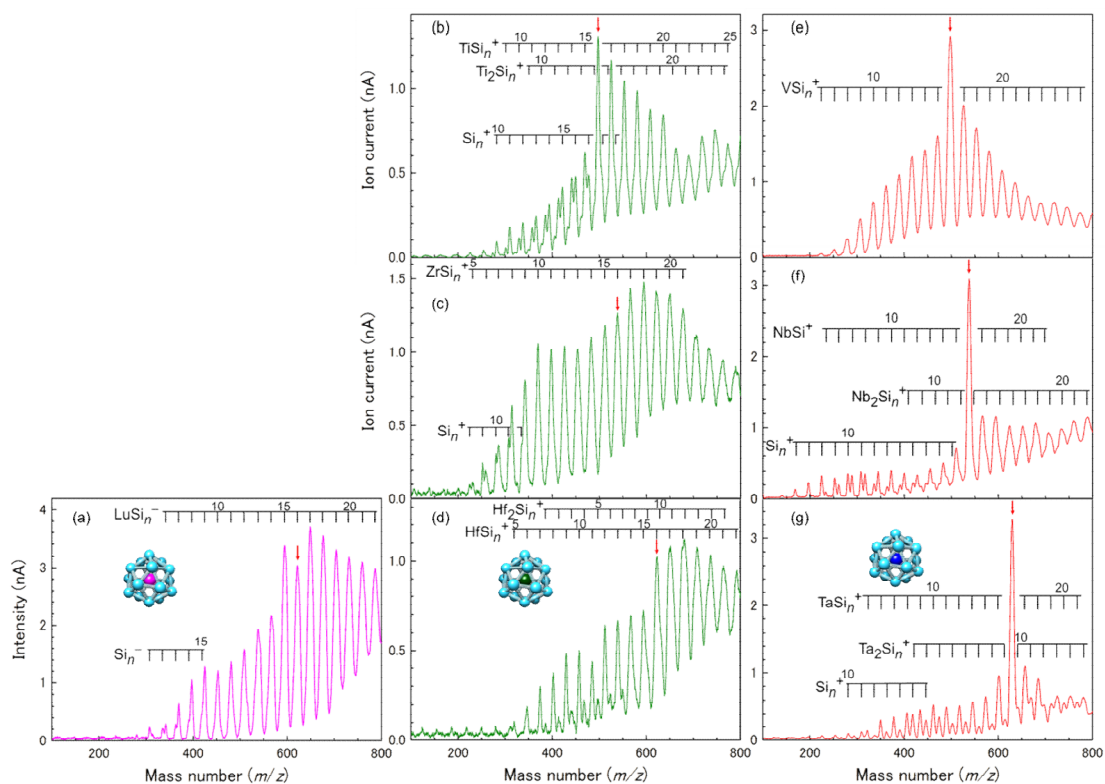

**Figure S1.** Mass spectra of M-Si binary NC anions of (a) M = Lu and cations of M = (b) Ti, (c) Zr, (d) Hf, (e) V, (f) Nb, and (g) Ta. Red arrows indicate the peak corresponding to M@Si<sub>16</sub><sup>+/-</sup>.

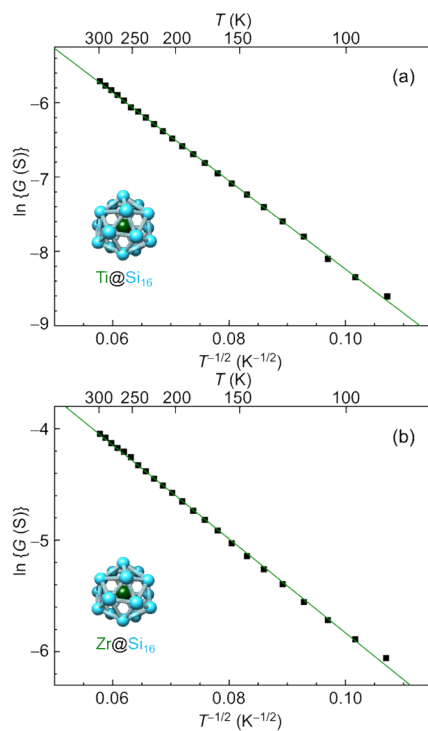

**Figure S2.** Plots of  $\ln G$  versus  $T^{-1/2}$  relationship for Ti@Si<sub>16</sub> and Zr@Si<sub>16</sub> assembled films.

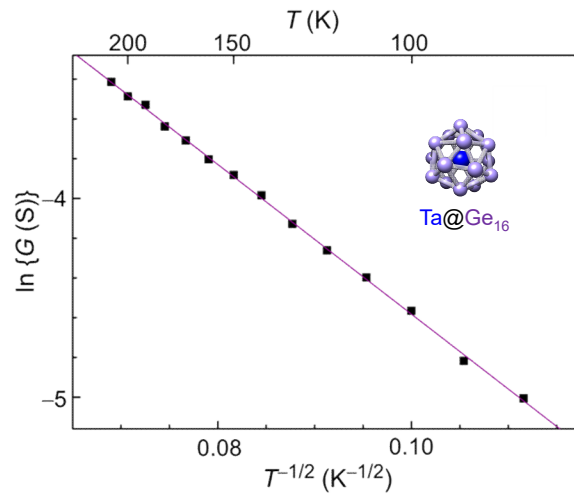

**Figure S3.** Plots of  $\ln G$  versus  $T^{-1/2}$  relationship for Ta@Ge<sub>16</sub> assembled films based on ES-VRH model.
